# Supplementary material for: Forests: Carbon sequestration, biomass energy, or both?
Source: PubMed Central journal article supplement — Sci Adv. 2020 Mar 25;6(13):eaay6792. doi: 10.1126/sciadv.aay6792 (PMC7096156; doi:10.1126/sciadv.aay6792), 2020-03-25
Supplement: aay6792_SM.pdf [file aay6792_SM.pdf]

## Supplementary Materials for

### **Forests: Carbon sequestration, biomass energy, or both?**

Alice Favero, Adam Daigneault\*, Brent Sohngen

\*Corresponding author. Email: adam.daigneault@maine.edu

Published 25 March 2020, *Sci. Adv.* 6, eaay6792 (2020)

DOI: 10.1126/sciadv.aay6792

#### **This PDF file includes:**

Supplementary Materials and Methods

Model estimates

Fig. S1. GTM—Regional Aggregation.

Fig. S2. Global assumptions for alternative RCP scenarios.

Fig. S3. Yield for representative species in the GTM.

Fig. S4. Estimated changes in global forest carbon stock pools in GtCO<sub>2</sub> relative to the baseline scenario under each RCP.

Fig. S5. Changes in global forest area by major ecosystem versus woody biomass supply under the bioenergy demand scenario relative to the baseline scenario.

Fig. S6. IAMs' estimates of forest areas and crop areas (2010–2100) under the RCP 1.9 and RCP 2.6 from the IIASA SSP database.

Fig. S7. Estimated changes in global forest carbon stock pools in GtCO<sub>2</sub> relative to the baseline scenario under each RCP and the two policy approaches.

Fig. S8. Key parameter sensitivity impacts relative to 2010 for RCP 2.6 Forest Carbon Rental scenario.

Table S1. GTM parameter values.

Table S2. Baseline key GTM estimates, 2010–2100.

Table S3. Baseline global forest area (Mha) by major ecosystem, 2010–2100.

Table S4. Baseline global total forest carbon stocks by major ecosystem, 2010–2100.

## Supplementary Materials and Methods

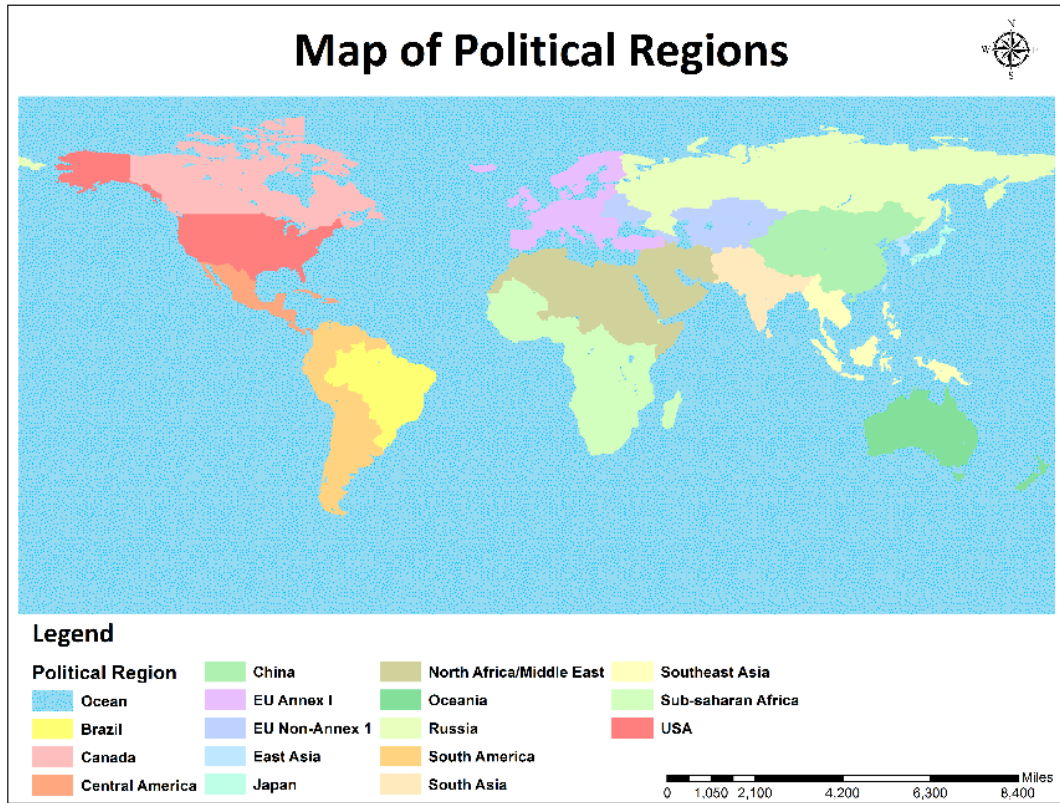

**Fig. S1. GTM—Regional Aggregation.**

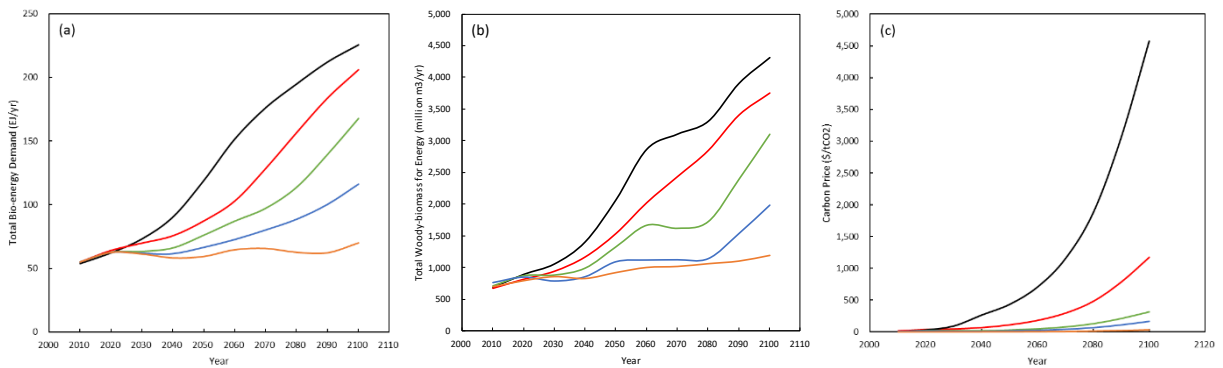

**Fig. S2. Global assumptions for alternative RCP scenarios.** (a) Total bio-energy consumption (EJ/yr), (b) Woody biomass supply (million m<sup>3</sup>/yr), and (c) Carbon price paths under each RCP. Black = RCP 1.9; Red = RCP 2.6; Green = RCP 3.4; Blue = RCP 4.5, Orange = RCP 6.0.

**Table S1. GTM parameter values.**

| Parameter                              | Symbol        | Value             |
|----------------------------------------|---------------|-------------------|
| Income elasticity                      | $\theta$      | 0.9               |
| Price elasticity                       | $\omega$      | 1.1               |
| Stocking Elasticity                    | $\tau$        | 0.05-0.13         |
| Initial stocking                       | $\varphi$     | Species dependent |
| Growth and yield                       | $\delta, \pi$ | Species dependent |
| Biomass to carbon conversion           | $\sigma$      | Species dependent |
| Proportion of harvest to wood products | $\kappa$      | 0.3               |
| Harvest biomass to carbon conversion   | $\beta$       | Species dependent |
| Soil carbon growth rate                | $\mu$         | 0.03              |
| Slash decomposition                    | $\vartheta$   | Varies by region  |
| Land supply elasticity                 | $\zeta$       | 0.25              |

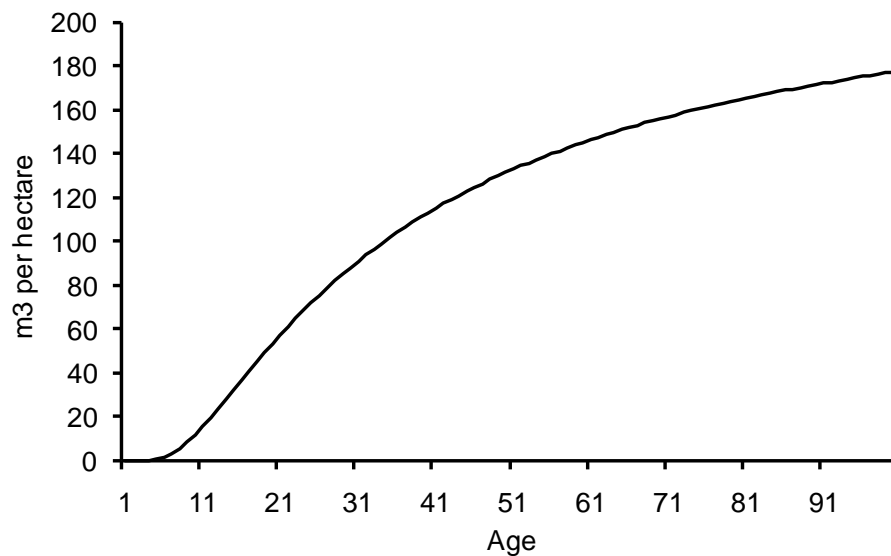

**Fig. S3. Yield for representative species in the GTM.**

## Model estimates

**Table S2. Baseline key GTM estimates, 2010–2100.**

| <b>Year</b> | <b>Woody Bio-energy (Mm3)</b> | <b>Forest C Stock (GtCO2e)</b> | <b>Total Forest Area (Mha)</b> | <b>Plantation Area (Mha)</b> | <b>Natural Inaccessible/Unmanaged Forest Area (Mha)</b> | <b>Global Timber price (\$/m3)</b> | <b>Mean Mgmt Expend (\$/ha)</b> |
|-------------|-------------------------------|--------------------------------|--------------------------------|------------------------------|---------------------------------------------------------|------------------------------------|---------------------------------|
| 2010        | 0                             | 3,336                          | 3,466                          | 72                           | 2,289                                                   | \$127                              | \$355                           |
| 2020        | 0                             | 3,351                          | 3,350                          | 70                           | 2,193                                                   | \$140                              | \$189                           |
| 2030        | 0                             | 3,351                          | 3,333                          | 68                           | 2,107                                                   | \$152                              | \$199                           |
| 2040        | 0                             | 3,347                          | 3,348                          | 80                           | 2,023                                                   | \$169                              | \$311                           |
| 2050        | 0                             | 3,343                          | 3,356                          | 82                           | 1,938                                                   | \$191                              | \$258                           |
| 2060        | 0                             | 3,336                          | 3,393                          | 84                           | 1,850                                                   | \$206                              | \$310                           |
| 2070        | 0                             | 3,334                          | 3,426                          | 89                           | 1,761                                                   | \$230                              | \$382                           |
| 2080        | 0                             | 3,344                          | 3,469                          | 94                           | 1,671                                                   | \$257                              | \$368                           |
| 2090        | 0                             | 3,361                          | 3,516                          | 97                           | 1,580                                                   | \$290                              | \$407                           |
| 2100        | 0                             | 3,376                          | 3,548                          | 103                          | 1,489                                                   | \$329                              | \$435                           |

**Table S3. Baseline global forest area (Mha) by major ecosystem, 2010–2100.**

| <b>Year</b>                           | <b>Temperate</b> | <b>Boreal</b> | <b>Tropical</b> | <b>Total</b> |
|---------------------------------------|------------------|---------------|-----------------|--------------|
| Natural Unmanaged/Inaccessible Forest |                  |               |                 |              |
| 2010                                  | 1,002            | 515           | 772             | 2,289        |
| 2020                                  | 977              | 507           | 709             | 2,193        |
| 2030                                  | 961              | 502           | 644             | 2,107        |
| 2040                                  | 948              | 500           | 576             | 2,023        |
| 2050                                  | 935              | 498           | 505             | 1,938        |
| 2060                                  | 923              | 496           | 431             | 1,850        |
| 2070                                  | 911              | 495           | 356             | 1,761        |
| 2080                                  | 898              | 494           | 279             | 1,671        |
| 2090                                  | 886              | 492           | 202             | 1,580        |
| 2100                                  | 872              | 491           | 127             | 1,489        |
| Low-Managed Forest                    |                  |               |                 |              |
| 2010                                  | 693              | 106           | 306             | 1,105        |
| 2020                                  | 683              | 117           | 287             | 1,087        |
| 2030                                  | 724              | 123           | 312             | 1,158        |
| 2040                                  | 743              | 129           | 372             | 1,245        |
| 2050                                  | 762              | 131           | 442             | 1,336        |
| 2060                                  | 806              | 136           | 517             | 1,459        |
| 2070                                  | 834              | 144           | 599             | 1,576        |
| 2080                                  | 868              | 149           | 687             | 1,704        |
| 2090                                  | 912              | 153           | 775             | 1,840        |
| 2100                                  | 944              | 158           | 853             | 1,956        |
| Intensive Plantation Forest           |                  |               |                 |              |
| 2010                                  | 48               | 4             | 20              | 72           |
| 2020                                  | 43               | 3             | 23              | 70           |
| 2030                                  | 38               | 4             | 26              | 68           |
| 2040                                  | 50               | 3             | 26              | 80           |
| 2050                                  | 50               | 4             | 27              | 82           |
| 2060                                  | 51               | 4             | 29              | 84           |
| 2070                                  | 55               | 4             | 29              | 89           |
| 2080                                  | 59               | 5             | 31              | 94           |
| 2090                                  | 60               | 5             | 32              | 97           |
| 2100                                  | 64               | 5             | 34              | 103          |
| Total Forest                          |                  |               |                 |              |
| 2010                                  | 1,743            | 625           | 1,098           | 3,466        |
| 2020                                  | 1,704            | 627           | 1,019           | 3,350        |
| 2030                                  | 1,723            | 629           | 981             | 3,333        |
| 2040                                  | 1,741            | 633           | 974             | 3,348        |
| 2050                                  | 1,748            | 633           | 975             | 3,356        |
| 2060                                  | 1,780            | 636           | 977             | 3,393        |
| 2070                                  | 1,799            | 643           | 984             | 3,426        |
| 2080                                  | 1,825            | 647           | 997             | 3,469        |
| 2090                                  | 1,857            | 650           | 1,009           | 3,516        |
| 2100                                  | 1,880            | 654           | 1,014           | 3,548        |

**Table S4. Baseline global total forest carbon stocks by major ecosystem, 2010–2100.**

| <b>Year</b> | <b>Temperate</b>         |                            | <b>Boreal</b>            |                            | <b>Tropical</b>          |                            | <b>Total</b>             |                            |
|-------------|--------------------------|----------------------------|--------------------------|----------------------------|--------------------------|----------------------------|--------------------------|----------------------------|
|             | <i>GtCO<sub>2e</sub></i> | <i>tCO<sub>2e</sub>/ha</i> | <i>GtCO<sub>2e</sub></i> | <i>tCO<sub>2e</sub>/ha</i> | <i>GtCO<sub>2e</sub></i> | <i>tCO<sub>2e</sub>/ha</i> | <i>GtCO<sub>2e</sub></i> | <i>tCO<sub>2e</sub>/ha</i> |
| 2010        | 1,601                    | 919                        | 761                      | 1,217                      | 974                      | 887                        | 3,336                    | 962                        |
| 2020        | 1,620                    | 951                        | 762                      | 1,215                      | 969                      | 951                        | 3,351                    | 1,000                      |
| 2030        | 1,631                    | 947                        | 762                      | 1,212                      | 957                      | 976                        | 3,351                    | 1,005                      |
| 2040        | 1,639                    | 941                        | 763                      | 1,206                      | 945                      | 971                        | 3,347                    | 1,000                      |
| 2050        | 1,646                    | 942                        | 765                      | 1,208                      | 932                      | 956                        | 3,343                    | 996                        |
| 2060        | 1,656                    | 930                        | 766                      | 1,204                      | 914                      | 935                        | 3,336                    | 983                        |
| 2070        | 1,665                    | 925                        | 767                      | 1,193                      | 903                      | 918                        | 3,334                    | 973                        |
| 2080        | 1,673                    | 917                        | 768                      | 1,187                      | 903                      | 906                        | 3,344                    | 964                        |
| 2090        | 1,684                    | 907                        | 769                      | 1,182                      | 909                      | 901                        | 3,361                    | 956                        |
| 2100        | 1,698                    | 903                        | 770                      | 1,177                      | 908                      | 896                        | 3,376                    | 952                        |

\* Forest carbon is tracked in four pools: aboveground carbon, soil carbon, forest product carbon, and slash.

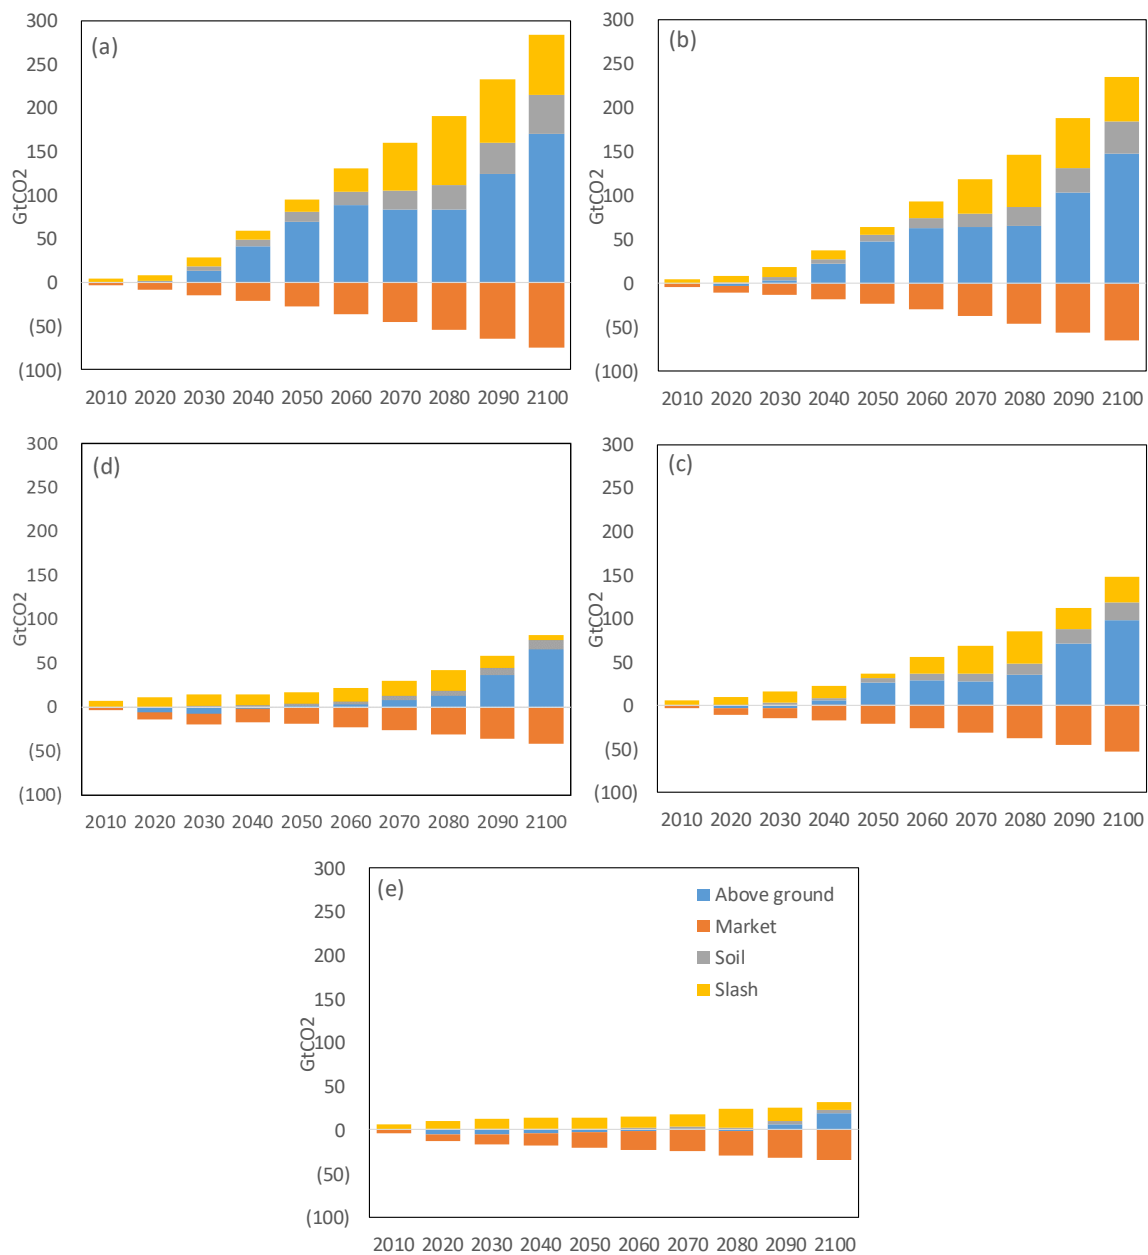

**Fig. S4. Estimated changes in global forest carbon stock pools in GtCO<sub>2</sub> relative to the baseline scenario under each RCP. (a) RCP 1.9; (b) RCP 2.6; (c) RCP 3.4; (d) RCP 4.5; (e) RCP 6.0**

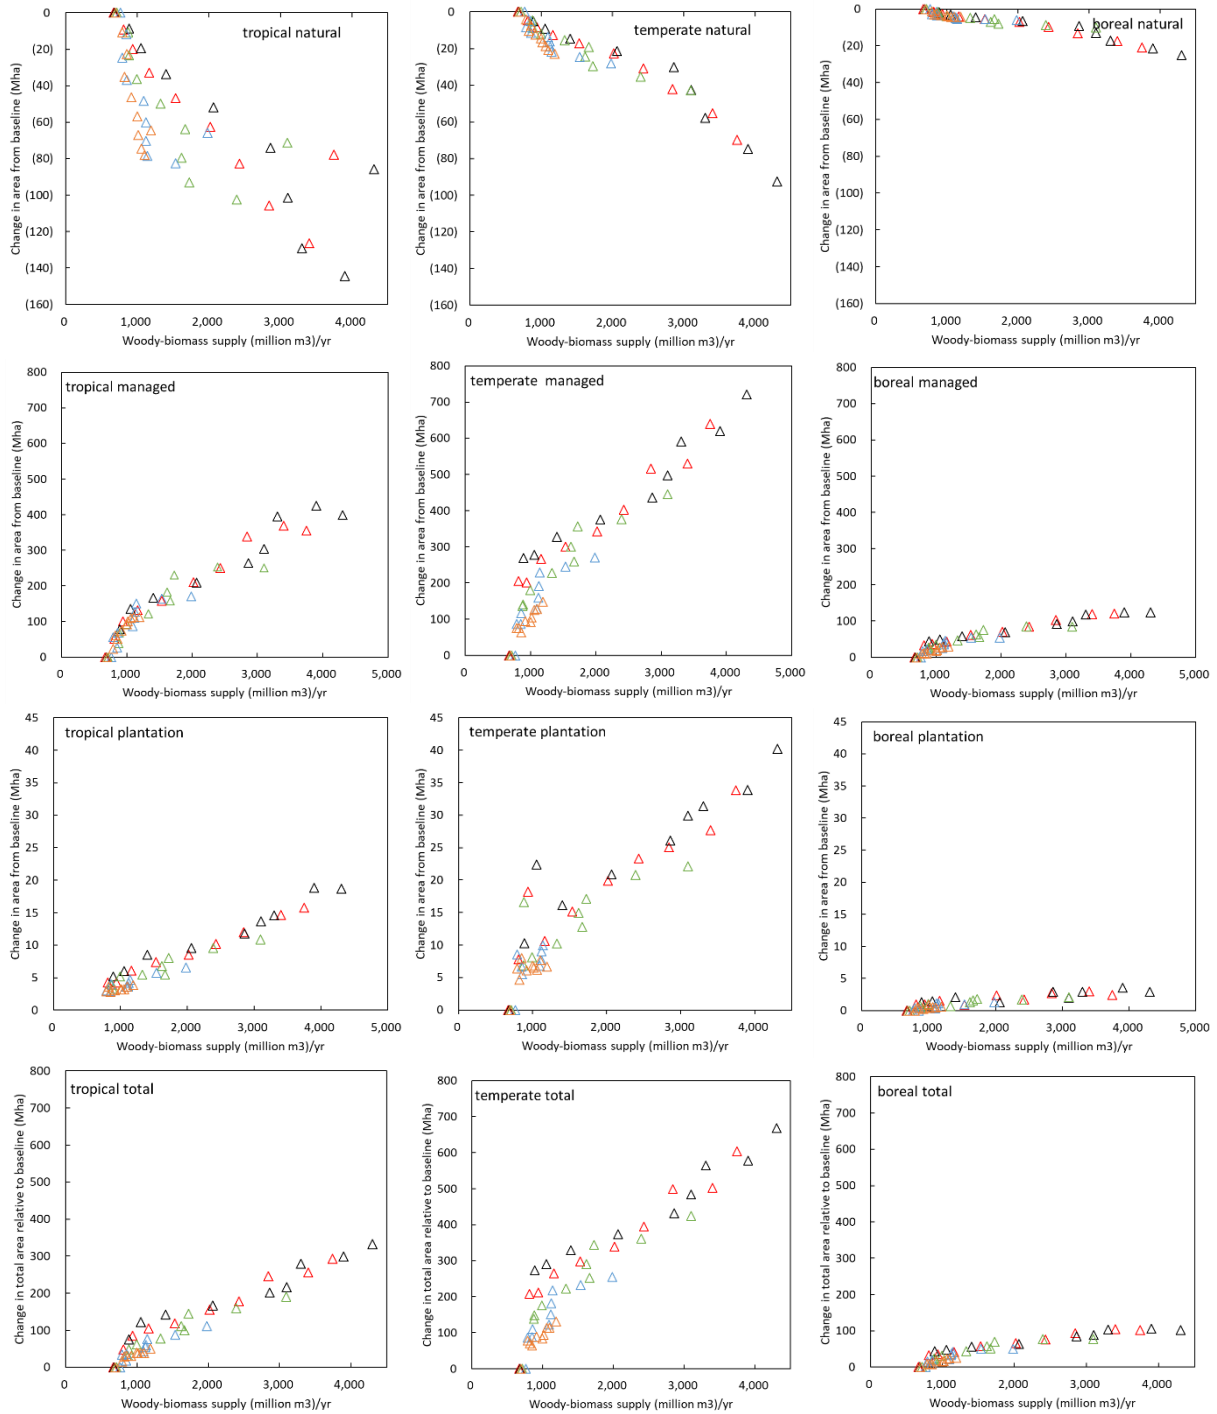

**Fig. S5. Changes in global forest area by major ecosystem versus woody biomass supply under the bioenergy demand scenario relative to the baseline scenario. Black = RCP 1.9; Red = RCP 2.6; Green = RCP 3.4; Blue = RCP 4.5, Orange = RCP 6.0.**



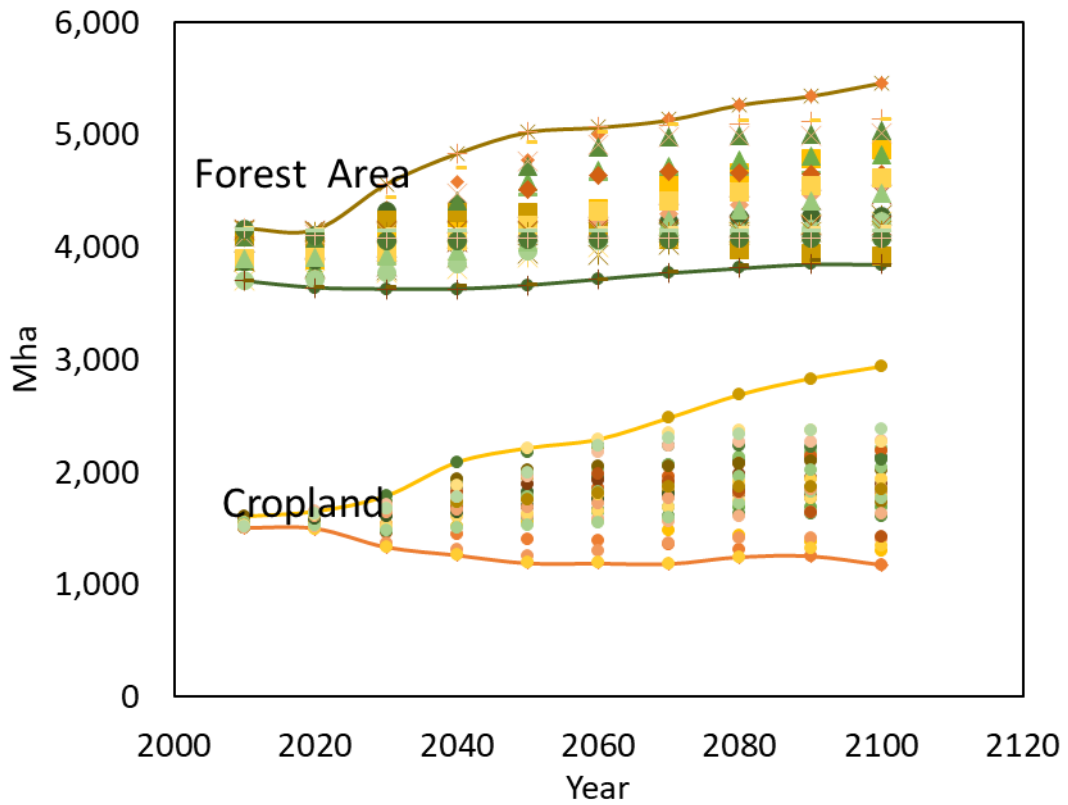

*Note:* Each mark represents one land value from one IAM for each SSP and RCP combination.  
**Fig. S6. IAMs' estimates of forest areas and crop areas (2010–2100) under the RCP 1.9 and RCP 2.6 from the IIASA SSP database.**

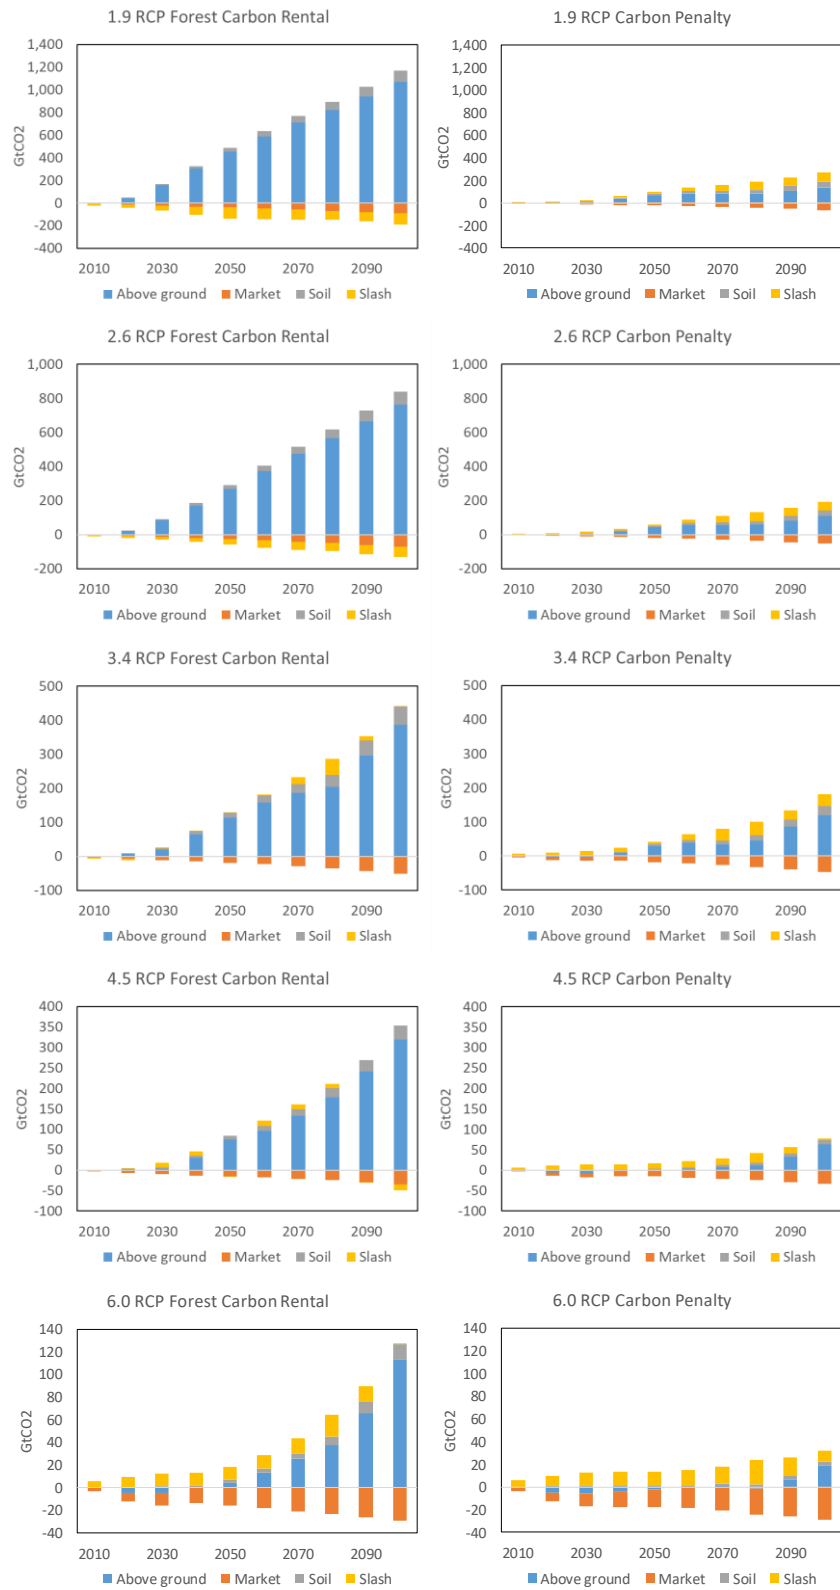

**Fig. S7. Estimated changes in global forest carbon stock pools in GtCO<sub>2</sub> relative to the baseline scenario under each RCP and the two policy approaches.**

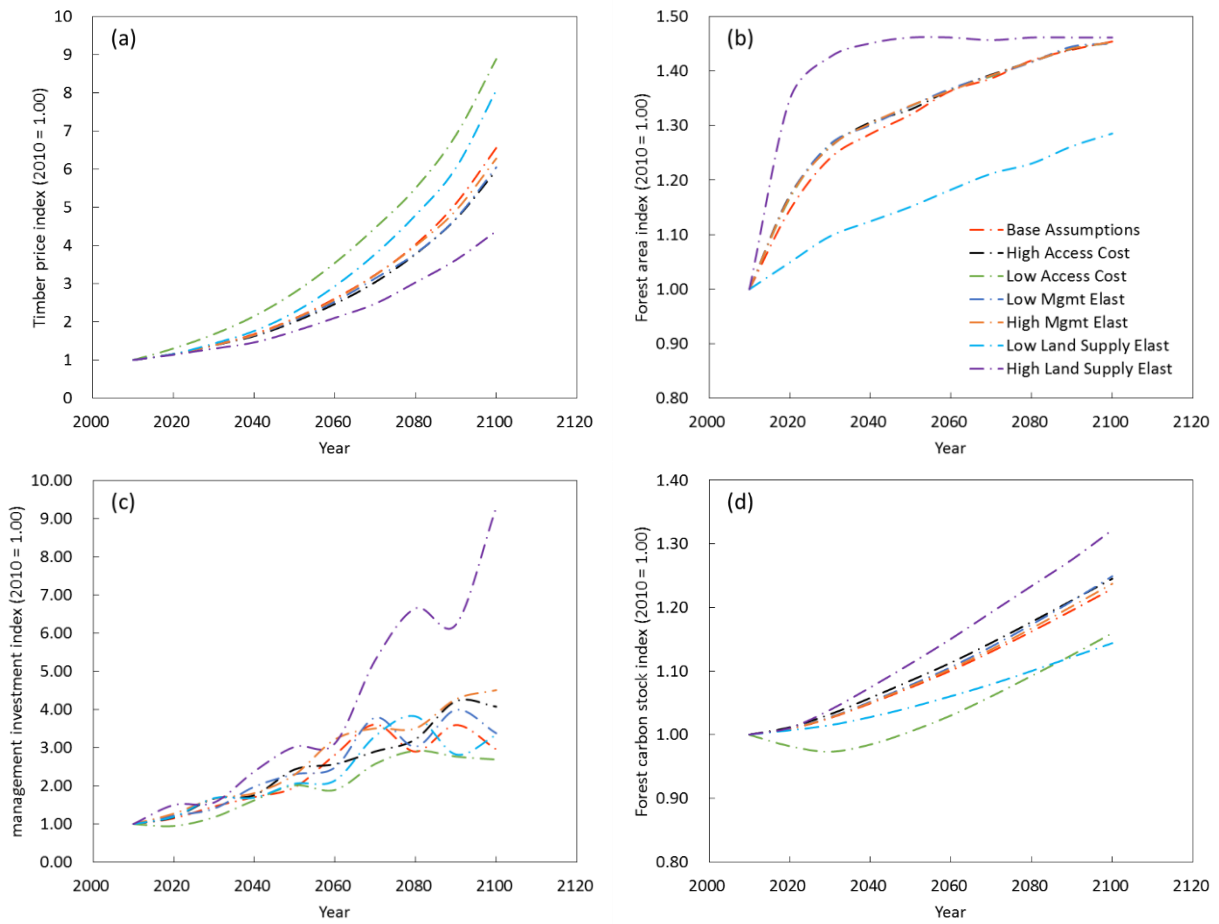

**Fig. S8. Key parameter sensitivity impacts relative to 2010 for RCP 2.6 Forest Carbon Rental scenario. (a) Timber prices, (b) total forest area, (c) management investment, and (d) forest carbon stocks.**
